# Supplementary material for: The role of nucleotide composition in premature termination codon recognition
Source: PubMed Central journal article supplement (PMC5142417; doi:10.1186/s12859-016-1384-z), 2016-12-07
Supplement: 12859_2016_1384_MOESM1_ESM.pdf [file 12859_2016_1384_MOESM1_ESM.pdf]

**Supplementary Tables for the paper:**  
**The role of nucleotide composition in premature  
termination codon recognition**

Fouad Zahdeh, Liran Carmel

|                          | classification scheme |            |        |            |
|--------------------------|-----------------------|------------|--------|------------|
|                          | Standard              |            | Strict |            |
|                          | Number                | Percentage | Number | Percentage |
| Stabilized (NMD-targets) | 217                   | 3.6%       | 90     | 1.5%       |
| Unaffected               | 4,329                 | 71.3%      | 3,864  | 63.7%      |
| Destabilized             | 169                   | 2.8%       | 62     | 1.0%       |
| Total classified         | 4,715                 | 77.7%      | 4,016  | 66.2%      |
| Total unclassified       | 1,354                 | 22.3%      | 2,053  | 33.8%      |
| <b>Total</b>             | 6,069                 |            | 6,069  |            |

**Table S1.** Summary of transcript classification based on how their mRNA abundance decay curve is affected by UPF1-knockdown.

| Feature name     | Present in the non-redundant set? <sup>a</sup> | Characterize stabilized? <sup>b</sup> | Characterize destabilized? <sup>c</sup> |
|------------------|------------------------------------------------|---------------------------------------|-----------------------------------------|
| sEJC             | Yes                                            | No                                    | No                                      |
| tuORF            | Yes                                            | No                                    | No                                      |
| tovORF           | Yes                                            | No                                    | No                                      |
| ALU              | Yes                                            | No                                    | Yes                                     |
| ALU density      | Yes                                            | No                                    | No                                      |
| 3'UTR A content  | No                                             | No                                    | No                                      |
| 3'UTR C content  | No                                             | No                                    | No                                      |
| 3'UTR G content  | Yes                                            | Yes                                   | Yes                                     |
| 3'UTR T content  | No                                             | No                                    | No                                      |
| CDS A content    | No                                             | No                                    | No                                      |
| CDS C content    | Yes                                            | Yes                                   | No                                      |
| CDS G content    | No                                             | No                                    | No                                      |
| CDS T content    | No                                             | No                                    | No                                      |
| 3'UTR AA content | No                                             | No                                    | No                                      |
| 3'UTR AC content | Yes                                            | No                                    | No                                      |
| 3'UTR AG content | Yes                                            | Yes                                   | No                                      |
| 3'UTR AT content | No                                             | No                                    | No                                      |
| 3'UTR CA content | Yes                                            | No                                    | No                                      |
| 3'UTR CC content | No                                             | No                                    | No                                      |
| 3'UTR CG content | No                                             | No                                    | No                                      |
| 3'UTR CT content | Yes                                            | Yes                                   | Yes                                     |
| 3'UTR GA content | Yes                                            | Yes                                   | No                                      |
| 3'UTR GC content | No                                             | No                                    | No                                      |
| 3'UTR GG content | No                                             | No                                    | No                                      |
| 3'UTR GT content | Yes                                            | No                                    | No                                      |
| 3'UTR TA content | No                                             | No                                    | No                                      |
| 3'UTR TC content | Yes                                            | No                                    | Yes                                     |
| 3'UTR TG content | Yes                                            | Yes                                   | No                                      |

|                       |     |     |     |
|-----------------------|-----|-----|-----|
| 3'UTR TT content      | No  | No  | No  |
| CDS AA content        | No  | No  | No  |
| CDS AC content        | Yes | No  | No  |
| CDS AG content        | Yes | No  | No  |
| CDS AT content        | Yes | Yes | No  |
| CDS CA content        | Yes | No  | No  |
| CDS CC content        | No  | No  | No  |
| CDS CG content        | Yes | No  | No  |
| CDS CT content        | Yes | No  | No  |
| CDS GA content        | Yes | No  | No  |
| CDS GC content        | Yes | No  | Yes |
| CDS GG content        | Yes | Yes | No  |
| CDS GT content        | Yes | No  | No  |
| CDS TA content        | Yes | Yes | No  |
| CDS TC content        | Yes | No  | No  |
| CDS TG content        | Yes | No  | No  |
| CDS TT content        | Yes | No  | No  |
| # 3'UTR A runs        | No  | No  | No  |
| # 3'UTR C runs        | No  | No  | No  |
| # 3'UTR G runs        | Yes | Yes | No  |
| # 3'UTR T runs        | Yes | No  | Yes |
| # CDS A runs          | Yes | No  | No  |
| # CDS C runs          | Yes | No  | No  |
| # CDS G runs          | Yes | No  | No  |
| # CDS T runs          | Yes | No  | No  |
| $\chi^2$ 3'UTR A runs | Yes | No  | No  |
| $\chi^2$ 3'UTR C runs | No  | No  | No  |
| $\chi^2$ 3'UTR G runs | Yes | Yes | No  |
| $\chi^2$ 3'UTR T runs | Yes | No  | No  |
| $\chi^2$ CDS A runs   | Yes | No  | Yes |
| $\chi^2$ CDS C runs   | Yes | No  | No  |
| $\chi^2$ CDS G runs   | Yes | No  | No  |
| $\chi^2$ CDS T runs   | Yes | No  | No  |
| 3'UTR length          | No  | No  | No  |
| CDS length            | Yes | No  | No  |

**Table S2.** Putative NMD-triggering features examined in the current study. <sup>a</sup> Features marked by 'Yes' belong to the non-redundant set, meaning that they are sufficiently uncorrelated to each other. <sup>b</sup> Features marked by 'Yes' are significantly different between NMD-targets and unaffected transcripts ( $P < 0.05$ , FDR-corrected U-test) and also have high effect size ( $|A - 0.5| \geq 0.1$ ). <sup>c</sup> Features marked by 'Yes' are significantly different between destabilized and unaffected transcripts ( $P < 0.05$ , FDR-corrected U-test) and also have high effect size ( $|A - 0.5| \geq 0.1$ ).

| Feature | Stabilized vs. unaffected |         | Destabilized vs. unaffected |         | Stabilized vs. destabilized |         |
|---------|---------------------------|---------|-----------------------------|---------|-----------------------------|---------|
|         | Enrichment                | P-value | Enrichment                  | P-value | Enrichment                  | P-value |
| sEJC    | 0.7                       | 0.7     | 1.2                         | 0.8     | 0.6                         | 0.4     |
| tuORF   | 1.4                       | 0.1     | 1.4                         | 0.1     | 1.0                         | 1.0     |
| tovORF  | 0.6                       | 0.2     | 1.1                         | 0.8     | 0.6                         | 0.3     |
| ALU     | 1.0                       | 0.9     | 0.5                         | 0.002*  | 2.1                         | 0.02*   |

**Table S3.** The level of enrichment of each binary feature (its fraction in one class divided by its fraction in the second class). Asterisks denote significant enrichments ( $P < 0.05$ , Fisher exact test).

| Feature name        | stabilized vs. unaffected |          | destabilized vs. unaffected |          | stabilized vs. destabilized |          |
|---------------------|---------------------------|----------|-----------------------------|----------|-----------------------------|----------|
|                     | ES                        | P-value  | ES                          | P-value  | ES                          | P-value  |
| CDS A content       | -0.09                     | 2.27e-05 | -0.10                       | 5.75e-05 | 0.01                        | 8.27e-01 |
| CDS C content       | 0.10                      | 1.77e-06 | 0.08                        | 6.66e-04 | 0.01                        | 8.27e-01 |
| CDS G content       | 0.08                      | 4.82e-05 | 0.07                        | 6.75e-03 | 0.02                        | 5.69e-01 |
| CDS T content       | -0.09                     | 1.41e-05 | -0.04                       | 8.27e-02 | -0.05                       | 1.99e-01 |
| CDS AA content      | -0.07                     | 4.01e-04 | -0.06                       | 8.03e-03 | -0.01                       | 8.37e-01 |
| CDS AC content      | -0.00                     | 9.88e-01 | -0.01                       | 7.54e-01 | 0.01                        | 8.96e-01 |
| CDS AG content      | 0.02                      | 2.40e-01 | -0.05                       | 3.95e-02 | 0.07                        | 4.40e-02 |
| CDS AT content      | -0.10                     | 8.06e-07 | -0.04                       | 1.08e-01 | -0.06                       | 1.10e-01 |
| CDS CA content      | 0.02                      | 2.50e-01 | -0.01                       | 6.13e-01 | 0.04                        | 3.53e-01 |
| CDS CC content      | 0.08                      | 3.05e-05 | 0.07                        | 2.89e-03 | 0.01                        | 8.27e-01 |
| CDS CG content      | 0.06                      | 1.21e-03 | 0.08                        | 1.17e-04 | -0.03                       | 4.98e-01 |
| CDS CT content      | 0.02                      | 3.92e-01 | 0.05                        | 3.95e-02 | -0.03                       | 3.77e-01 |
| CDS GA content      | -0.01                     | 5.07e-01 | -0.02                       | 3.00e-01 | 0.01                        | 8.37e-01 |
| CDS GC content      | 0.07                      | 3.19e-04 | 0.10                        | 1.40e-05 | -0.03                       | 4.55e-01 |
| CDS GG content      | 0.10                      | 7.46e-06 | 0.04                        | 9.64e-02 | 0.05                        | 1.82e-01 |
| CDS GT content      | 0.00                      | 9.07e-01 | -0.03                       | 2.06e-01 | 0.03                        | 3.77e-01 |
| CDS TA content      | -0.10                     | 3.31e-07 | -0.08                       | 4.81e-04 | -0.02                       | 5.57e-01 |
| CDS TC content      | 0.01                      | 7.98e-01 | 0.01                        | 7.62e-01 | -0.00                       | 9.75e-01 |
| CDS TG content      | -0.01                     | 7.41e-01 | 0.03                        | 1.73e-01 | -0.04                       | 2.90e-01 |
| CDS TT content      | -0.07                     | 4.33e-04 | -0.06                       | 1.14e-02 | -0.01                       | 8.11e-01 |
| $\chi^2$ CDS A runs | -0.05                     | 2.77e-02 | -0.10                       | 2.86e-05 | 0.05                        | 1.82e-01 |
| $\chi^2$ CDS C runs | 0.06                      | 2.39e-03 | 0.07                        | 5.74e-03 | -0.00                       | 9.75e-01 |
| $\chi^2$ CDS G runs | 0.06                      | 2.34e-03 | 0.07                        | 5.18e-03 | 0.00                        | 9.95e-01 |
| $\chi^2$ CDS T runs | -0.07                     | 4.27e-04 | -0.04                       | 1.06e-01 | -0.04                       | 3.77e-01 |
| # CDS A runs        | -0.05                     | 1.46e-03 | -0.08                       | 2.55e-05 | 0.03                        | 2.70e-01 |
| # CDS C runs        | 0.03                      | 7.59e-02 | 0.03                        | 1.54e-01 | 0.00                        | 9.75e-01 |
| # CDS G runs        | 0.06                      | 2.87e-05 | 0.02                        | 1.63e-01 | 0.04                        | 2.40e-01 |
| # CDS T runs        | -0.02                     | 2.28e-01 | -0.01                       | 3.50e-01 | -0.00                       | 9.75e-01 |
| 3'UTR A content     | -0.20                     | 2.38e-21 | -0.17                       | 1.68e-12 | -0.01                       | 8.37e-01 |
| 3'UTR C content     | 0.17                      | 1.79e-17 | 0.15                        | 1.52e-09 | 0.01                        | 8.37e-01 |
| 3'UTR G content     | 0.23                      | 2.12e-28 | 0.11                        | 3.35e-06 | 0.12                        | 3.78e-04 |
| 3'UTR T content     | -0.19                     | 1.50e-20 | -0.10                       | 8.26e-05 | -0.10                       | 6.10e-03 |
| 3'UTR AA content    | -0.20                     | 4.02e-23 | -0.14                       | 7.59e-09 | -0.07                       | 8.69e-02 |
| 3'UTR AC content    | -0.02                     | 4.23e-01 | -0.04                       | 1.25e-01 | 0.02                        | 6.35e-01 |
| 3'UTR AG content    | 0.15                      | 9.43e-14 | -0.05                       | 3.22e-02 | 0.19                        | 7.94e-09 |
| 3'UTR AT content    | -0.20                     | 4.02e-23 | -0.15                       | 1.23e-09 | -0.05                       | 2.61e-01 |
| 3'UTR CA content    | 0.08                      | 1.01e-04 | 0.00                        | 9.69e-01 | 0.08                        | 2.78e-02 |

|                                        |       |          |       |          |       |          |
|----------------------------------------|-------|----------|-------|----------|-------|----------|
| <b>3'UTR CC content</b>                | 0.17  | 1.63e-17 | 0.15  | 5.64e-10 | -0.00 | 9.75e-01 |
| <b>3'UTR CG content</b>                | 0.18  | 1.25e-18 | 0.12  | 6.07e-07 | 0.04  | 2.63e-01 |
| <b>3'UTR CT content</b>                | 0.11  | 2.71e-07 | 0.10  | 4.02e-05 | 0.01  | 9.61e-01 |
| <b>3'UTR GA content</b>                | 0.09  | 7.50e-06 | -0.06 | 1.38e-02 | 0.14  | 2.24e-05 |
| <b>3'UTR GC content</b>                | 0.19  | 8.36e-20 | 0.12  | 6.00e-07 | 0.07  | 9.16e-02 |
| <b>3'UTR GG content</b>                | 0.21  | 4.11e-25 | 0.13  | 2.32e-07 | 0.08  | 2.78e-02 |
| <b>3'UTR GT content</b>                | 0.03  | 1.97e-01 | -0.03 | 2.74e-01 | 0.05  | 1.82e-01 |
| <b>3'UTR TA content</b>                | -0.21 | 4.45e-24 | -0.15 | 7.82e-10 | -0.06 | 1.23e-01 |
| <b>3'UTR TC content</b>                | 0.05  | 1.52e-02 | 0.09  | 2.29e-04 | -0.05 | 1.99e-01 |
| <b>3'UTR TG content</b>                | 0.11  | 4.01e-07 | 0.03  | 2.19e-01 | 0.07  | 6.33e-02 |
| <b>3'UTR TT content</b>                | -0.18 | 1.58e-18 | -0.07 | 2.44e-03 | -0.12 | 7.90e-04 |
| <b><math>\chi^2</math>3'UTR A runs</b> | -0.03 | 2.28e-01 | -0.04 | 1.29e-01 | 0.01  | 8.37e-01 |
| <b><math>\chi^2</math>3'UTR C runs</b> | 0.13  | 9.31e-10 | 0.04  | 8.99e-02 | 0.08  | 4.07e-02 |
| <b><math>\chi^2</math>3'UTR G runs</b> | 0.12  | 1.79e-08 | 0.06  | 9.65e-03 | 0.05  | 1.79e-01 |
| <b><math>\chi^2</math>3'UTR T runs</b> | 0.00  | 9.99e-01 | -0.04 | 1.17e-01 | 0.04  | 3.53e-01 |
| <b># 3'UTR A runs</b>                  | -0.06 | 4.05e-03 | -0.12 | 3.06e-07 | 0.07  | 5.39e-02 |
| <b># 3'UTR C runs</b>                  | 0.14  | 2.98e-12 | 0.03  | 2.11e-01 | 0.11  | 9.57e-04 |
| <b># 3'UTR G runs</b>                  | 0.15  | 6.43e-14 | 0.01  | 7.86e-01 | 0.15  | 8.62e-06 |
| <b># 3'UTR T runs</b>                  | -0.04 | 7.59e-02 | -0.10 | 9.07e-05 | 0.07  | 8.69e-02 |
| <b>CDS length</b>                      | 0.05  | 1.18e-02 | -0.01 | 7.86e-01 | 0.06  | 1.22e-01 |
| <b>3'UTR length</b>                    | 0.04  | 7.74e-02 | -0.08 | 1.10e-03 | 0.13  | 2.89e-04 |
| <b>ALU density</b>                     | 0.01  | 7.28e-01 | -0.05 | 2.44e-03 | 0.06  | 1.25e-02 |

**Table S4.** Effect size (ES,  $A = 0.5$ ) and P-value (FDR-corrected, U-test) of the non-redundant features, for all pairwise comparisons of transcript groups.

| Feature name     | EJC-independent SMG6 target |          | Up-regulated EJC-independent SMG6 target |          |
|------------------|-----------------------------|----------|------------------------------------------|----------|
|                  | ES                          | P-value  | ES                                       | P-value  |
| CDS A content    | -0.04                       | 1.22e-01 | -0.07                                    | 1.98e-01 |
| CDS C content    | 0.04                        | 1.31e-01 | 0.03                                     | 5.75e-01 |
| CDS G content    | 0.02                        | 3.76e-01 | 0.04                                     | 4.55e-01 |
| CDS T content    | -0.01                       | 6.46e-01 | 0.02                                     | 7.62e-01 |
| CDS AA content   | -0.00                       | 8.80e-01 | -0.03                                    | 5.99e-01 |
| CDS AC content   | -0.01                       | 6.46e-01 | -0.05                                    | 3.42e-01 |
| CDS AG content   | -0.02                       | 5.58e-01 | -0.00                                    | 9.85e-01 |
| CDS AT content   | -0.05                       | 5.39e-02 | -0.05                                    | 4.22e-01 |
| CDS CA content   | 0.00                        | 9.27e-01 | -0.03                                    | 6.25e-01 |
| CDS CC content   | 0.04                        | 1.20e-01 | 0.05                                     | 3.69e-01 |
| CDS CG content   | 0.03                        | 2.53e-01 | 0.02                                     | 7.02e-01 |
| CDS CT content   | 0.03                        | 3.42e-01 | 0.03                                     | 5.75e-01 |
| CDS GA content   | -0.00                       | 9.27e-01 | -0.02                                    | 8.27e-01 |
| CDS GC content   | 0.03                        | 3.12e-01 | 0.05                                     | 4.05e-01 |
| CDS GG content   | 0.06                        | 1.74e-02 | 0.10                                     | 4.11e-02 |
| CDS GT content   | -0.05                       | 5.92e-02 | -0.03                                    | 5.75e-01 |
| CDS TA content   | -0.06                       | 1.30e-02 | -0.08                                    | 7.13e-02 |
| CDS TC content   | 0.01                        | 7.86e-01 | 0.03                                     | 5.84e-01 |
| CDS TG content   | -0.01                       | 7.84e-01 | -0.01                                    | 8.57e-01 |
| CDS TT content   | 0.02                        | 5.58e-01 | 0.04                                     | 5.12e-01 |
| $\chi^2$ CDS A   | -0.01                       | 7.86e-01 | -0.04                                    | 4.89e-01 |
| $\chi^2$ CDS C   | 0.02                        | 5.42e-01 | 0.01                                     | 8.43e-01 |
| $\chi^2$ CDS G   | 0.02                        | 6.24e-01 | 0.01                                     | 9.02e-01 |
| $\chi^2$ CDS T   | 0.02                        | 6.24e-01 | 0.07                                     | 1.65e-01 |
| # CDS A runs     | 0.01                        | 7.41e-01 | -0.00                                    | 9.85e-01 |
| # CDS C runs     | 0.01                        | 7.86e-01 | 0.00                                     | 9.87e-01 |
| # CDS G runs     | 0.03                        | 1.41e-01 | -0.00                                    | 9.85e-01 |
| # CDS T runs     | 0.02                        | 3.07e-01 | 0.05                                     | 1.27e-01 |
| 3'UTR A content  | -0.12                       | 6.06e-07 | -0.12                                    | 1.17e-02 |
| 3'UTR C content  | 0.07                        | 4.19e-03 | 0.08                                     | 1.31e-01 |
| 3'UTR G content  | 0.08                        | 1.39e-03 | 0.09                                     | 7.13e-02 |
| 3'UTR T content  | -0.04                       | 1.24e-01 | -0.04                                    | 4.61e-01 |
| 3'UTR AA content | -0.12                       | 6.17e-07 | -0.14                                    | 3.47e-03 |
| 3'UTR AC content | -0.01                       | 8.19e-01 | -0.00                                    | 9.85e-01 |
| 3'UTR AG content | -0.01                       | 6.85e-01 | 0.02                                     | 8.27e-01 |
| 3'UTR AT content | -0.10                       | 7.02e-05 | -0.10                                    | 4.92e-02 |
| 3'UTR CA content | -0.05                       | 5.39e-02 | -0.05                                    | 3.69e-01 |
| 3'UTR CC content | 0.06                        | 2.99e-02 | 0.05                                     | 3.69e-01 |
| 3'UTR CG content | 0.05                        | 5.39e-02 | 0.09                                     | 7.53e-02 |

|                                    |       |          |       |          |
|------------------------------------|-------|----------|-------|----------|
| <b>3'UTR CT content</b>            | 0.10  | 2.31e-05 | 0.12  | 1.23e-02 |
| <b>3'UTR GA content</b>            | -0.03 | 3.61e-01 | 0.01  | 8.56e-01 |
| <b>3'UTR GC content</b>            | 0.08  | 6.80e-04 | 0.08  | 1.20e-01 |
| <b>3'UTR GG content</b>            | 0.06  | 3.02e-02 | 0.06  | 2.62e-01 |
| <b>3'UTR GT content</b>            | 0.05  | 5.92e-02 | 0.10  | 6.50e-02 |
| <b>3'UTR TA content</b>            | -0.08 | 5.01e-04 | -0.09 | 8.89e-02 |
| <b>3'UTR TC content</b>            | -0.01 | 7.86e-01 | 0.03  | 5.75e-01 |
| <b>3'UTR TG content</b>            | 0.13  | 1.91e-08 | 0.14  | 3.04e-03 |
| <b>3'UTR TT content</b>            | -0.06 | 1.72e-02 | -0.07 | 1.71e-01 |
| <b><math>\chi^2</math> 3'UTR A</b> | -0.17 | 2.44e-13 | -0.20 | 1.64e-05 |
| <b><math>\chi^2</math> 3'UTR C</b> | -0.11 | 3.49e-06 | -0.08 | 1.11e-01 |
| <b><math>\chi^2</math> 3'UTR G</b> | -0.14 | 5.35e-10 | -0.12 | 1.76e-02 |
| <b><math>\chi^2</math> 3'UTR T</b> | -0.15 | 1.52e-10 | -0.12 | 1.17e-02 |
| <b># 3'UTR A runs</b>              | -0.26 | 2.20e-29 | -0.25 | 2.45e-08 |
| <b># 3'UTR C runs</b>              | -0.18 | 1.15e-15 | -0.16 | 5.22e-04 |
| <b># 3'UTR G runs</b>              | -0.17 | 3.20e-14 | -0.14 | 2.89e-03 |
| <b># 3'UTR T runs</b>              | -0.22 | 6.08e-23 | -0.20 | 8.07e-06 |
| <b>CDS length</b>                  | -0.31 | 7.84e-40 | -0.32 | 2.30e-12 |
| <b>3'UTR length</b>                | -0.24 | 1.23e-25 | -0.21 | 4.33e-06 |

**Table S5.** Effect size (ES,  $A - 0.5$ ) and p-value (FDR-corrected, U-test) of the non-redundant features for the two validation sets.
