# Supplementary material for: The role of nucleotide composition in premature termination codon recognition
Source: PubMed Central journal article supplement (PMC5142417; doi:10.1186/s12859-016-1384-z), 2016-12-07

**Supplementary Figures for the paper:**

**The role of nucleotide composition in premature termination  
codon recognition**

Fouad Zahdeh, Liran Carmel

Figure S1

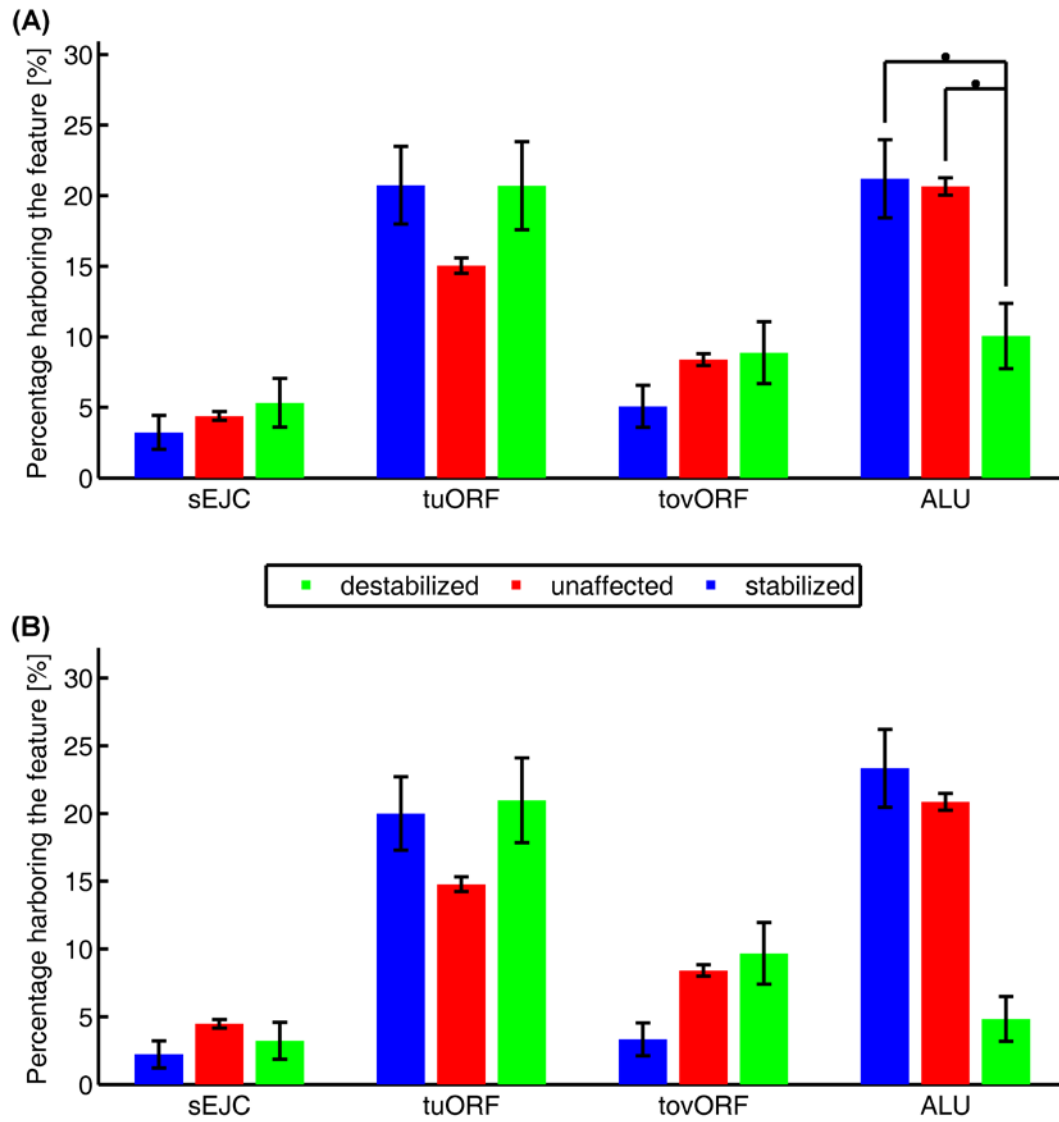

Figure S2

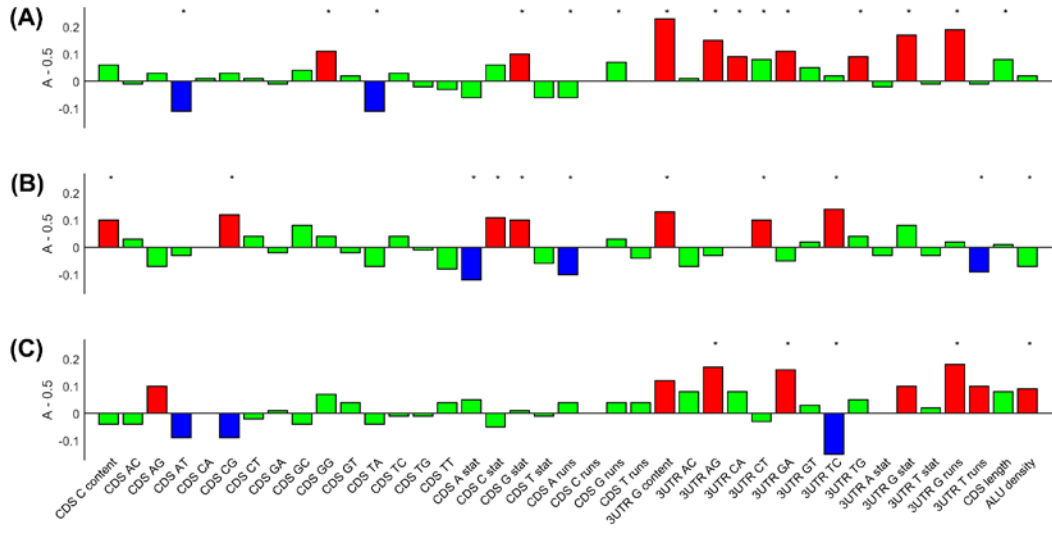

Figure S3

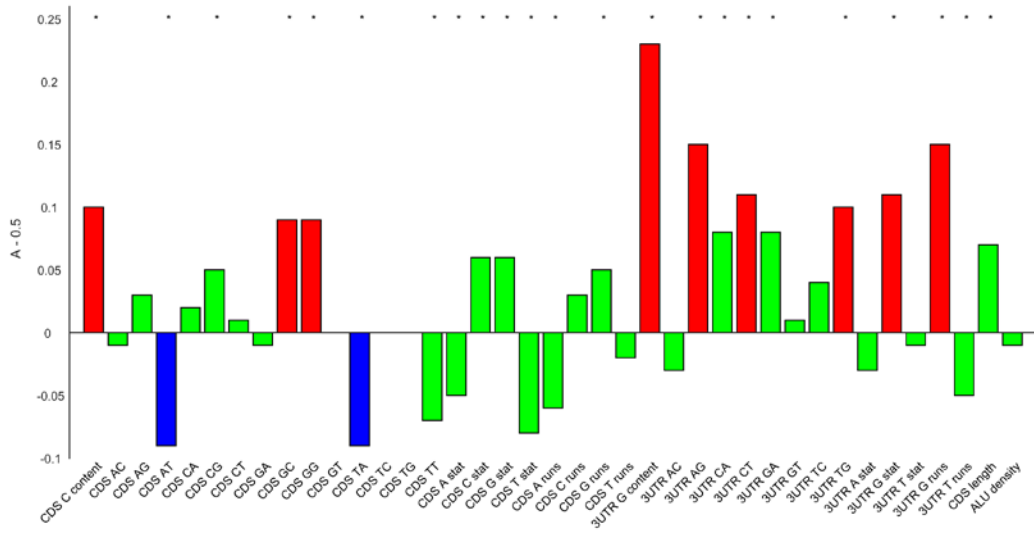

Figure S4

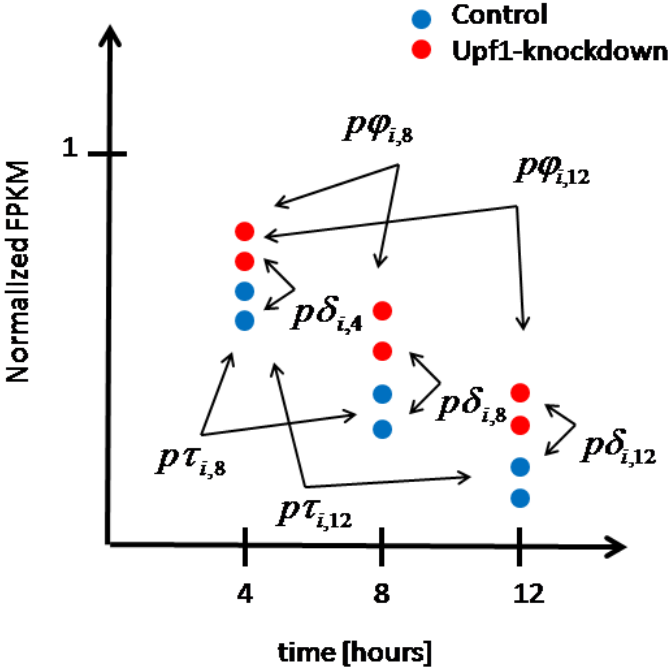

Supplement: 12859_2016_1384_MOESM2_ESM.pdf [file 12859_2016_1384_MOESM2_ESM.pdf]
